# Supplementary material
Source: Springer Nature journal article supplement (https://www.springermedizin.de/resource/supplementary/13054_2013_2600_MOESM2_ESM.pdf/9714432)

**(A) Left ventricle**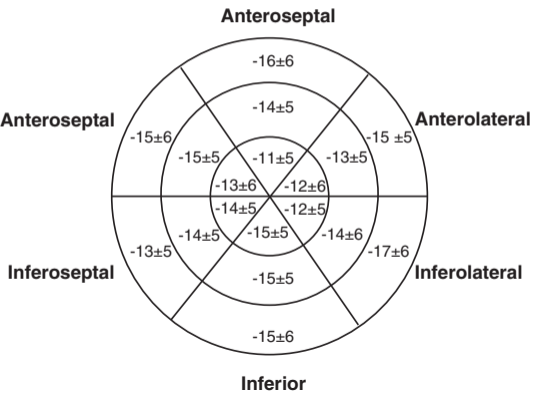**(B) Right ventricle**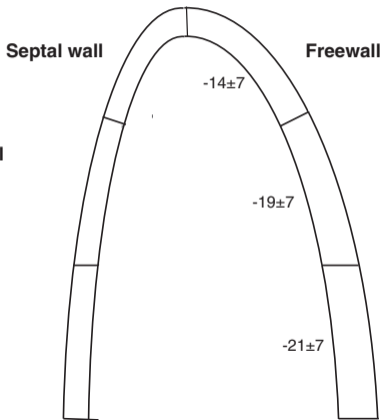

Supplement: MOESM2 [file 9714432]
